# Supplementary material for: A population-based validation study of the DCIS Score predicting recurrence risk in individuals treated by breast-conserving surgery alone
Source: PubMed Central journal article supplement — Breast Cancer Res Treat. 2015 Jun 29;152(2):389–98. doi: 10.1007/s10549-015-3464-6 (PMC4491104; doi:10.1007/s10549-015-3464-6), 2015-06-29
Supplement: 10549_2015_3464_MOESM2_ESM.pdf [file 10549_2015_3464_MOESM2_ESM.pdf]

# Supplemental Fig 2

**a**

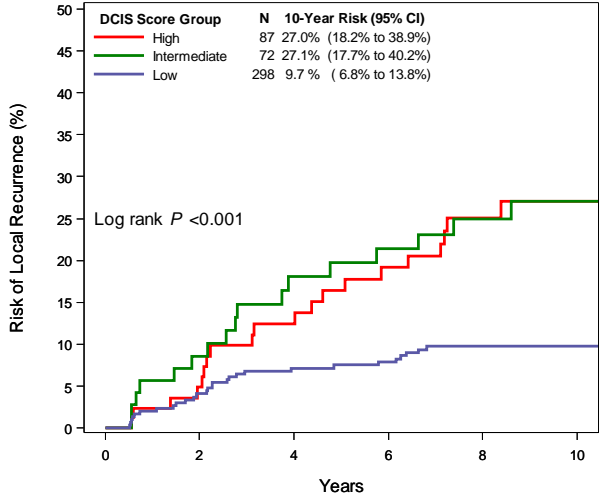

Number at risk

|              |     |     |     |     |     |     |
|--------------|-----|-----|-----|-----|-----|-----|
| High         | 87  | 76  | 67  | 59  | 43  | 32  |
| Intermediate | 72  | 59  | 50  | 47  | 37  | 24  |
| Low          | 298 | 283 | 262 | 250 | 186 | 125 |

**b**

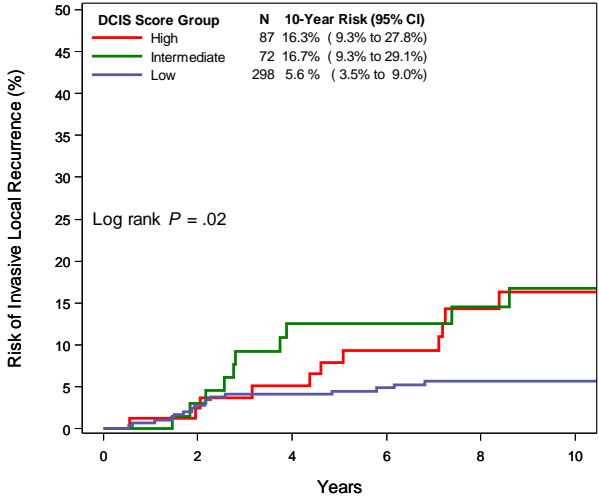

Number at risk

|              |     |     |     |     |     |     |
|--------------|-----|-----|-----|-----|-----|-----|
| High         | 87  | 77  | 69  | 62  | 46  | 34  |
| Intermediate | 72  | 62  | 52  | 51  | 40  | 27  |
| Low          | 298 | 283 | 263 | 251 | 189 | 128 |

**c**

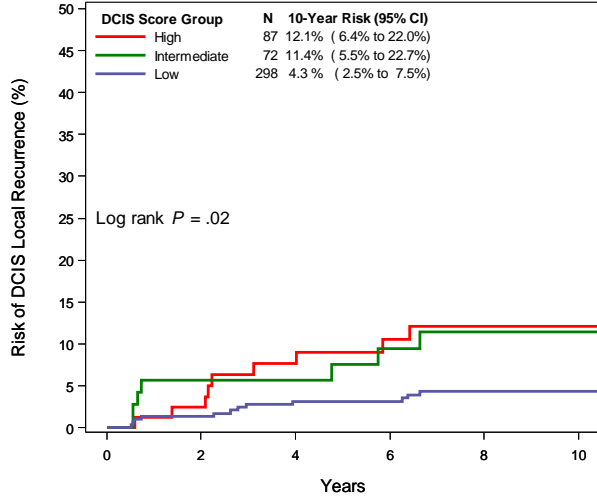

Number at risk

|              |     |     |     |     |     |     |
|--------------|-----|-----|-----|-----|-----|-----|
| High         | 87  | 76  | 67  | 59  | 43  | 32  |
| Intermediate | 72  | 59  | 50  | 47  | 37  | 24  |
| Low          | 298 | 283 | 262 | 250 | 186 | 125 |
