# Supplementary figures and images for: A population-based validation study of the DCIS Score predicting recurrence risk in individuals treated by breast-conserving surgery alone
Source: Springer Nature journal article supplement (doi:10.1007/s10549-015-3464-6), 2015-06-28

# Supplemental Fig 1

**a**

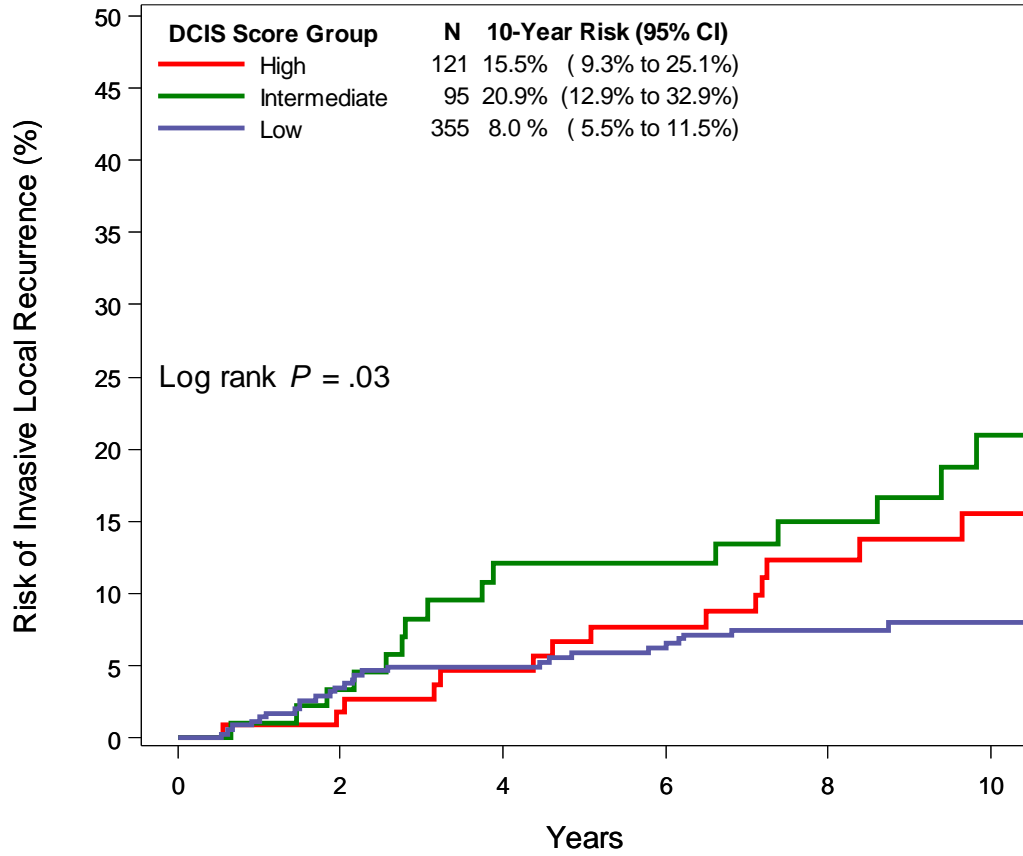

Number at risk

|              | 0   | 2   | 4   | 6   | 8   | 10  |
|--------------|-----|-----|-----|-----|-----|-----|
| High         | 121 | 107 | 96  | 88  | 66  | 45  |
| Intermediate | 95  | 81  | 68  | 67  | 51  | 33  |
| Low          | 355 | 331 | 307 | 292 | 221 | 148 |

**b**

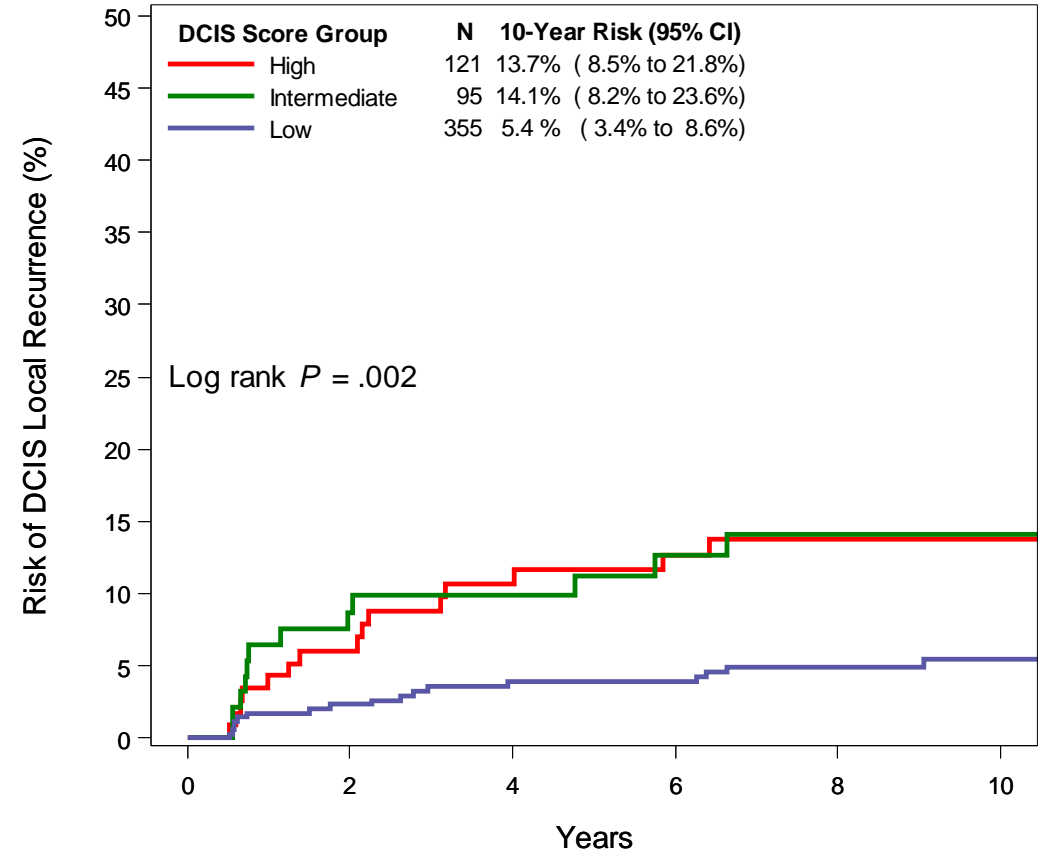

Number at risk

|              | 0   | 2   | 4   | 6   | 8   | 10  |
|--------------|-----|-----|-----|-----|-----|-----|
| High         | 121 | 104 | 92  | 83  | 61  | 42  |
| Intermediate | 95  | 77  | 66  | 63  | 48  | 30  |
| Low          | 355 | 329 | 304 | 289 | 217 | 143 |

Supplement: MOESM1 [file 8847302]

# Supplemental Fig 3

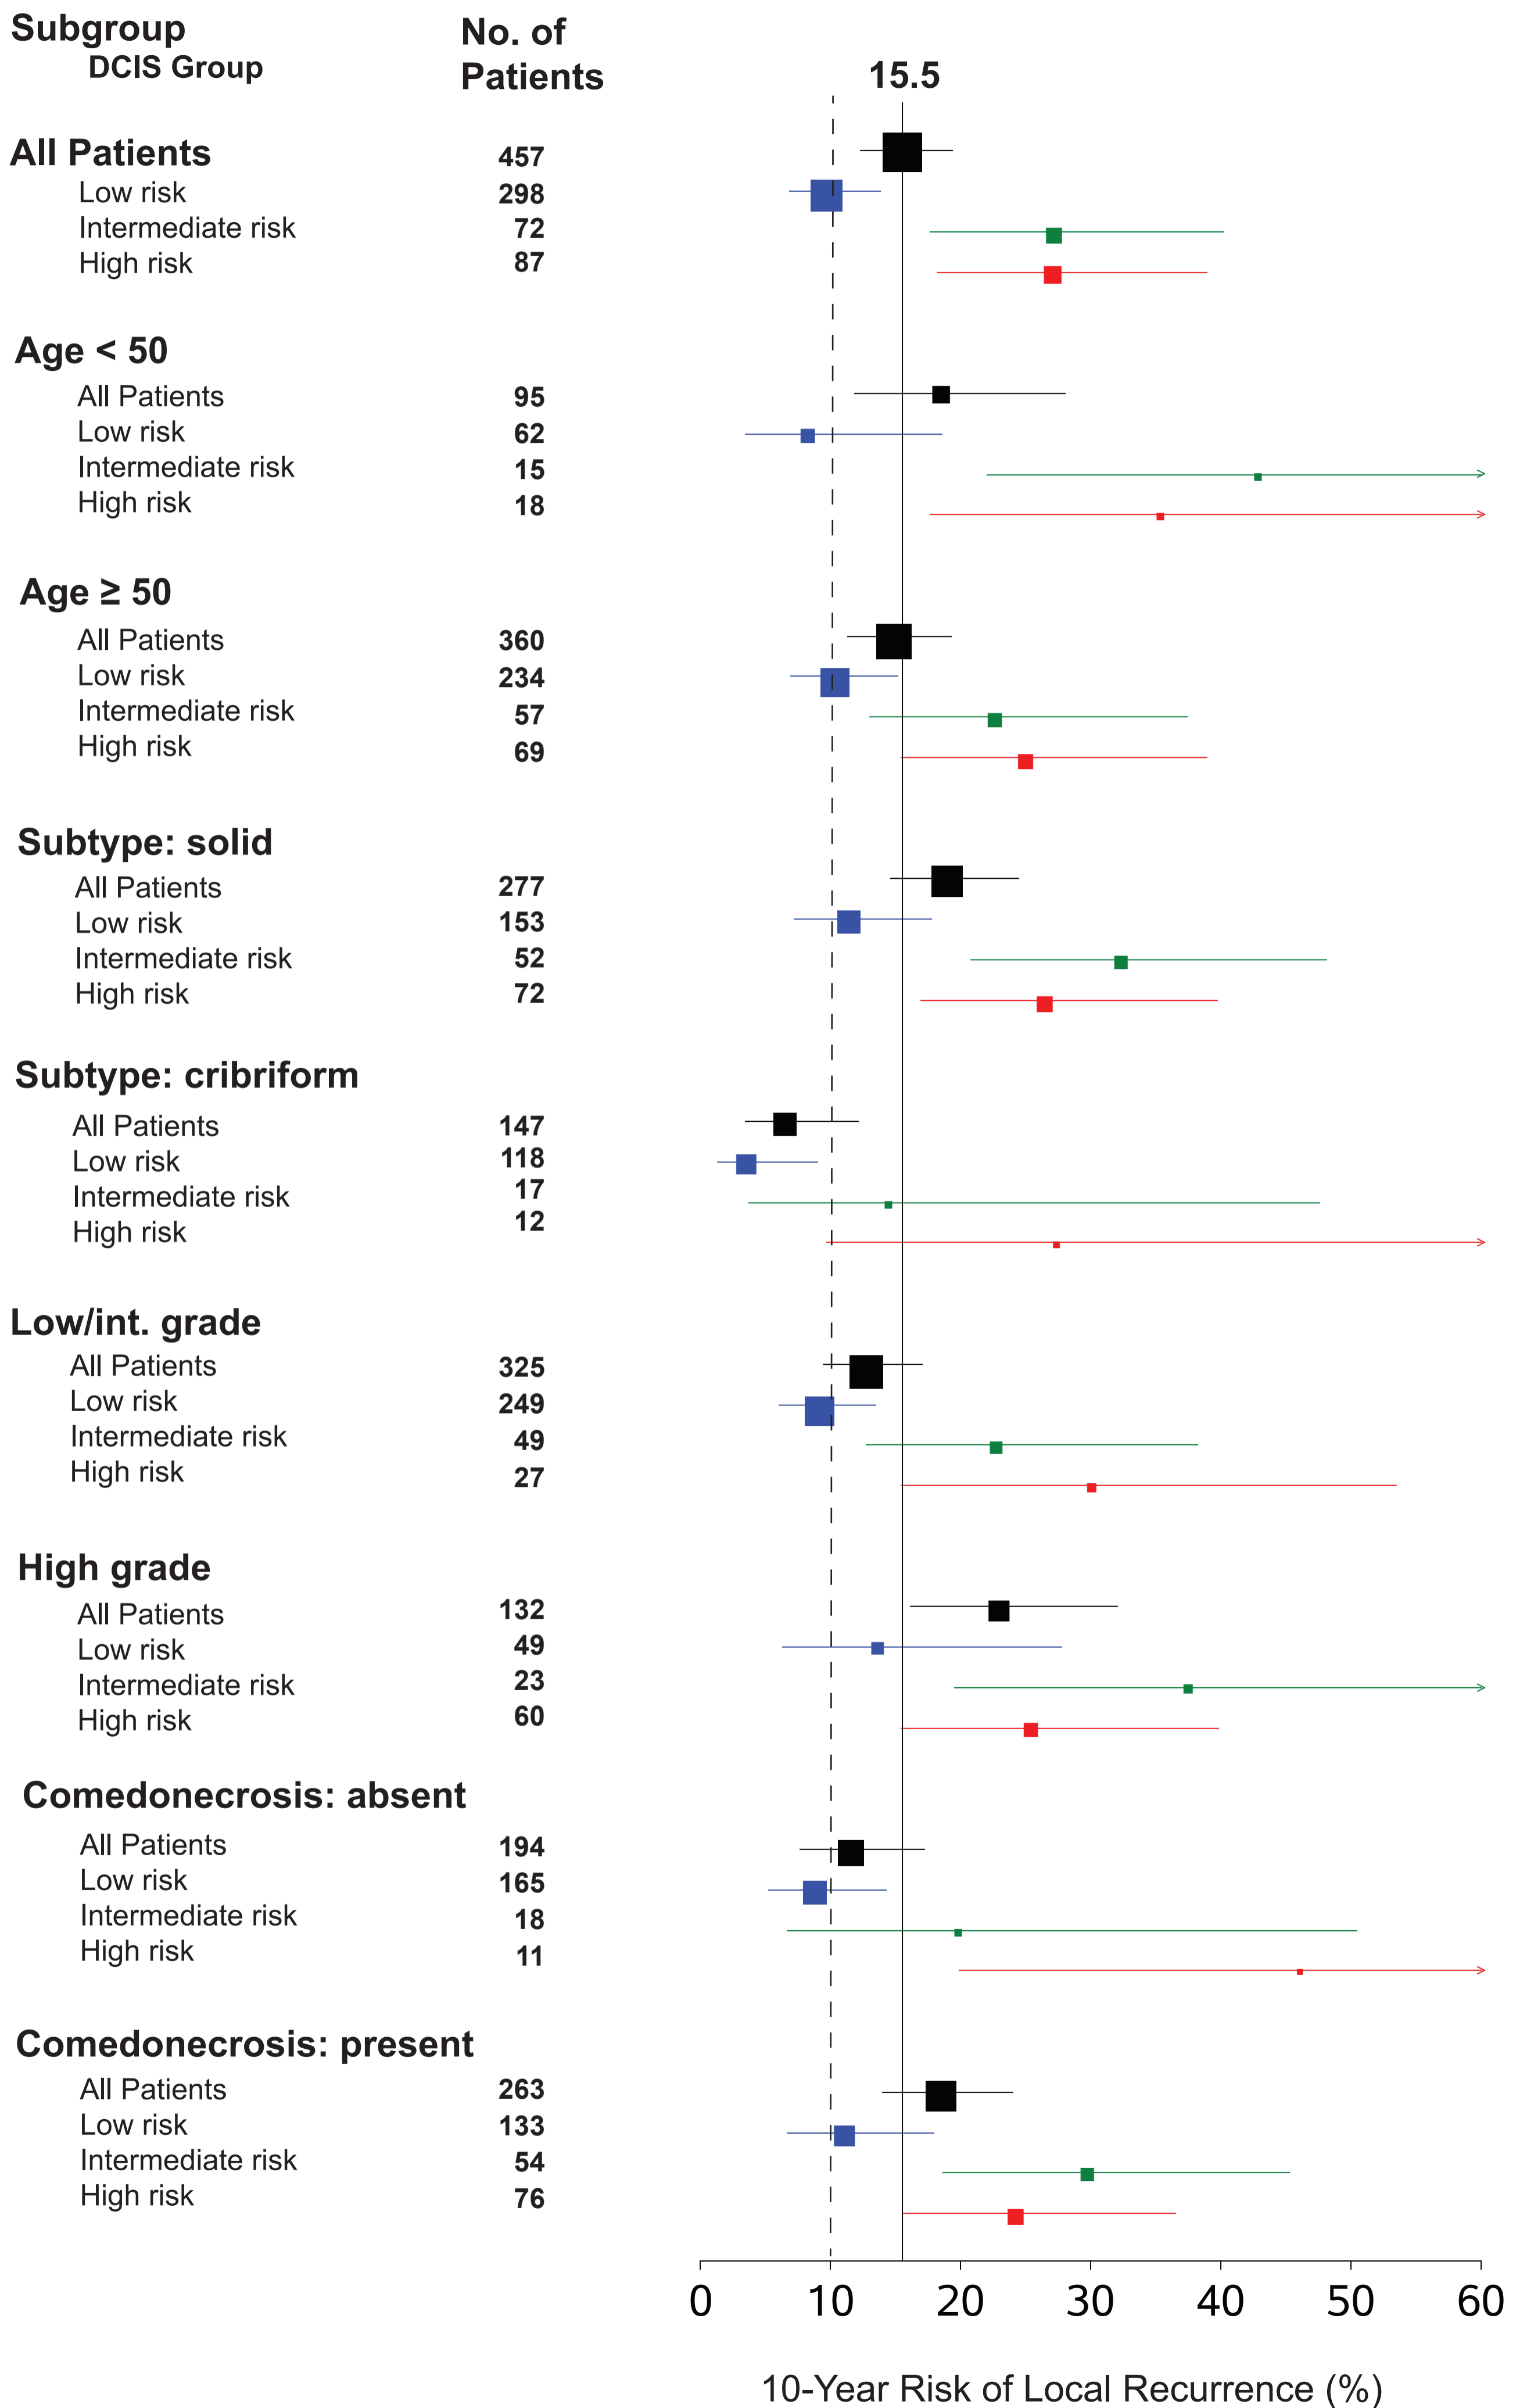

Supplement: MOESM3 [file 8847302]

# Supplemental Fig 4

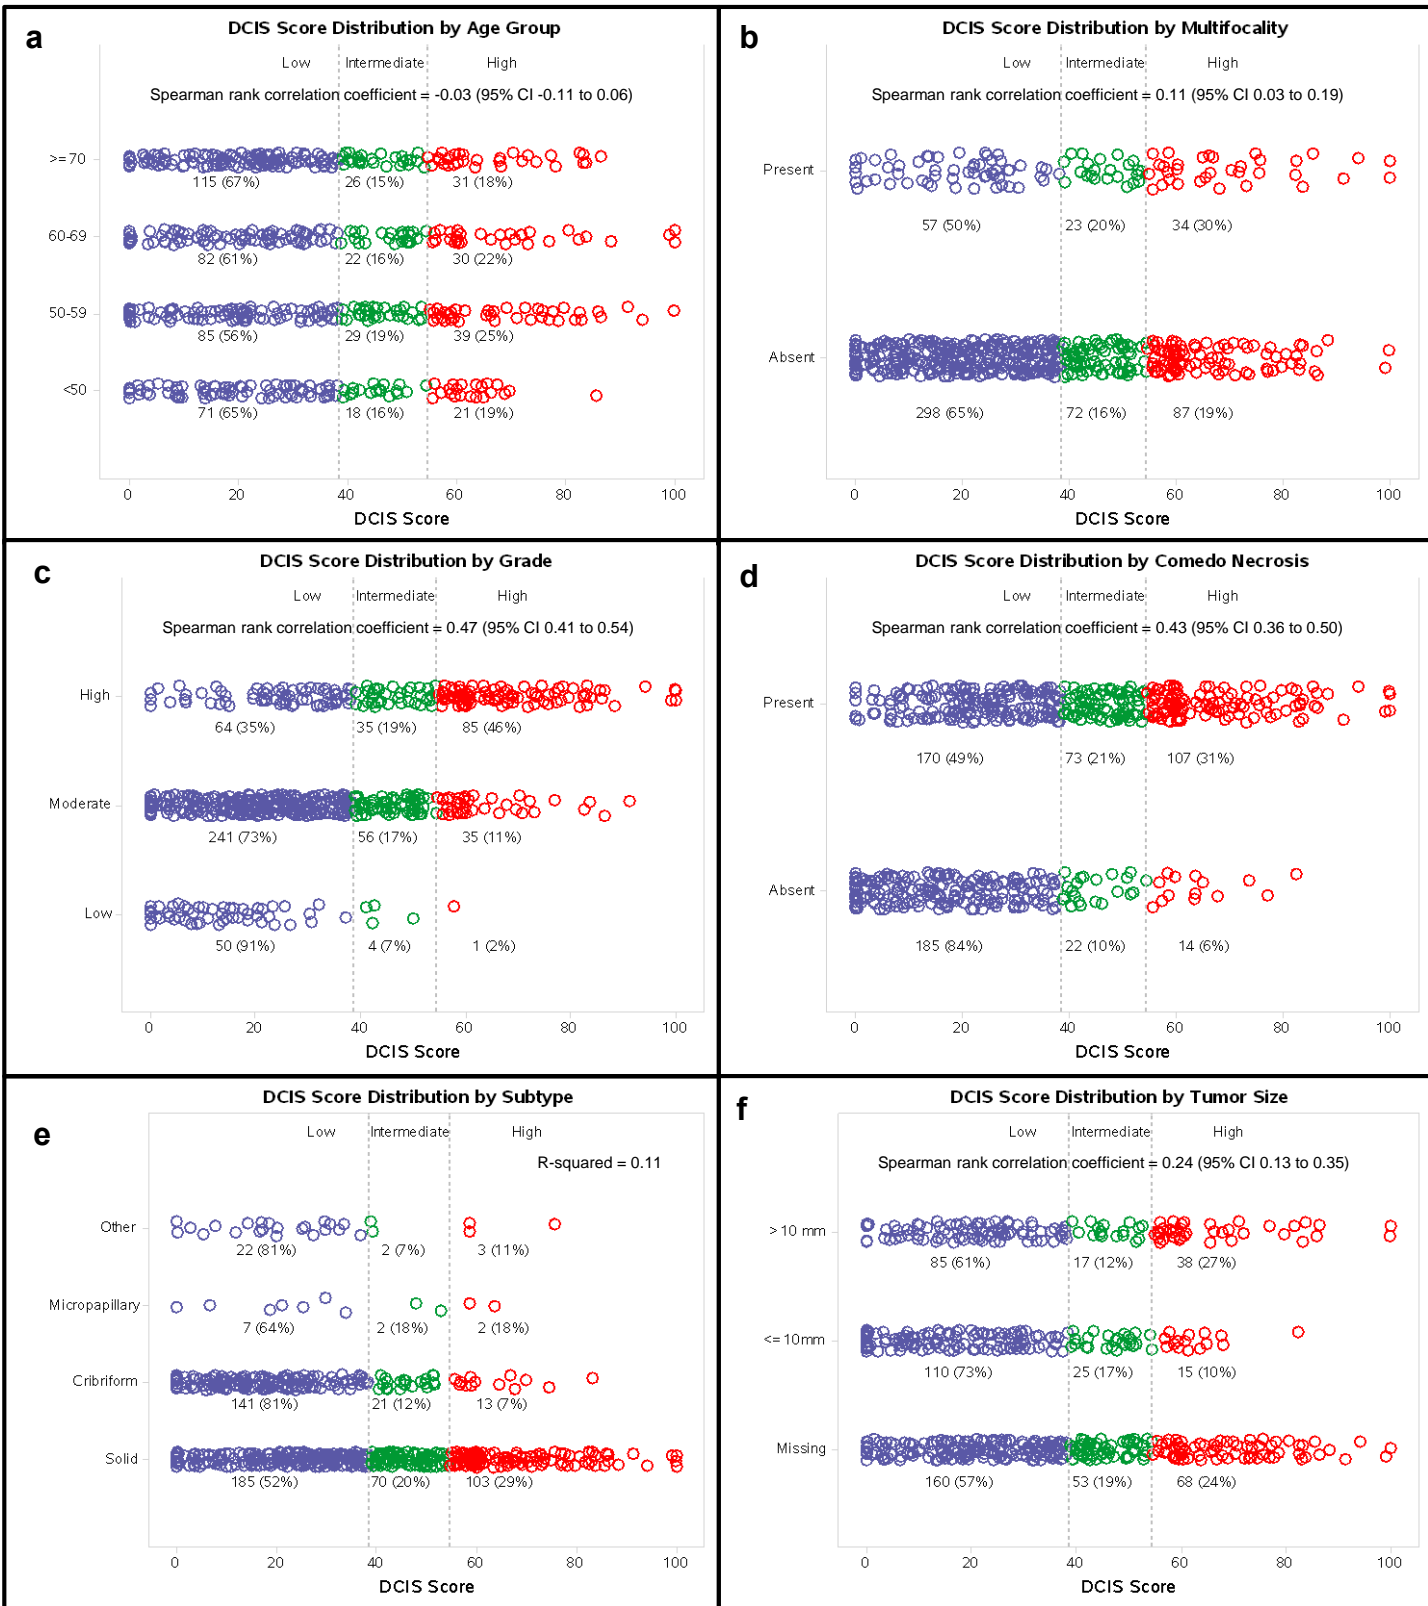

Supplement: MOESM4 [file 8847302]
